# Supplementary material for: A nonenzymatic electrochemical glucose sensor based on mesoporous Au/Pt nanodendrites
Source: Royal Society of Chemistry journal article supplement (doi:10.1039/c5ra16953d), 2015-01-01
Supplement: c5ra16953d1.pdf [file c5ra16953d1.pdf]

## Supplementary Information

### **Nonenzymatic Electrochemical Glucose Sensor Based on mesoporous Au/Pt nanodendrites**

Yang Song<sup>a</sup>, Chengzhou Zhu<sup>a</sup>, He Li<sup>a,b\*</sup>, Dan Du<sup>a</sup> and Yuehe Lin<sup>a\*</sup>

<sup>a</sup> *School of Mechanical and Material Engineering, Washington State university, Pullman, Washington 99163, United States*

<sup>b</sup> *School of Biological Science and Technology, University of Jinan, Jinan 250022, China.*

*Corresponding authors: Dr. Yuehe Lin ([yuehe.lin@wsu.edu](mailto:yuehe.lin@wsu.edu)); Dr. He Li ([lihecd@gmail.com](mailto:lihecd@gmail.com))*

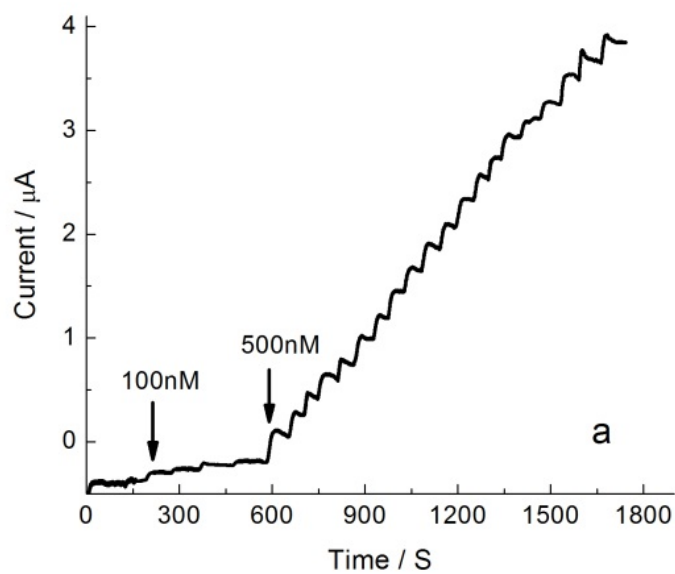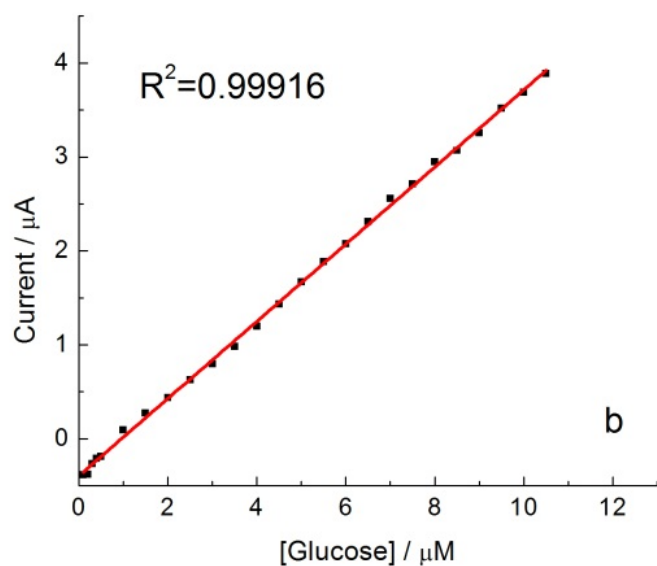

Figure S1. (a) Current real-time amperometric response of APME upon successively adding glucose into 0.1 M NaOH solution. The working potential is -0.35 V. The first five adding were 100 nM glucose whereas 500 nM after. (b) Calibration curve of our APME towards glucose concentration response in the range of 100 nM to 10  $\mu$ M at -0.35 V. The limit of detection is 40 nM (S/N = 3).
